# Supplementary material
Source: HighWire-hosted journal article supplement (https://www.cmajopen.ca/highwire/filestream/88287/field_highwire_adjunct_files/0/open-2021-0214-1-at.pdf)
Supplement: open-2021-0214-1-at.pdf [file open-2021-0214-1-at.pdf]

**Table S1.** Baseline characteristics according to availability of HbA1c results

| BASELINE CHARACTERISTICS                | No Hba1c result in at least<br>one study period | HbA1c result prior to and<br>during OHIP+ |
|-----------------------------------------|-------------------------------------------------|-------------------------------------------|
|                                         | N=5,090                                         | N=4,551                                   |
| Any drug claim during OHIP+, n (%)      | 4,190 (82.3%)                                   | 4,514 (99.2%)                             |
| Metformin claim during OHIP+, n(%)      | 126 (2.5%)                                      | 215 (4.7%)                                |
| Age (years), mean (SD)                  | 13.13 ± 4.83                                    | 15.58 ± 4.10                              |
| Male (%)                                | 2,767 (54.4%)                                   | 2,262 (49.7%)                             |
| Duration of diabetes (years), mean (SD) | 6.45 ± 3.95                                     | 7.74 ± 4.46                               |
| Deprivation Quintile                    |                                                 |                                           |
| 1 (least deprived)                      | 1,117 (21.9%)                                   | 1,067 (23.4%)                             |
| 2                                       | 996 (19.6%)                                     | 989 (21.7%)                               |
| 3                                       | 964 (18.9%)                                     | 915 (20.1%)                               |
| 4                                       | 912 (17.9%)                                     | 791 (17.4%)                               |
| 5 (most deprived)                       | 1,042 (20.5%)                                   | 734 (16.1%)                               |
| Missing                                 | 59 (1.2%)                                       | 55 (1.2%)                                 |
| Any public drug claim pre-OHIP+ (%)     | 1,480 (29.1%)                                   | 1,508 (33.1%)                             |

The following linear regression model was fit to the data:

$$\begin{aligned}
 y_{i,t} = & \beta_0 + \beta_1 Q_{2,i} + \beta_2 Q_{3,i} + \beta_3 Q_{4,i} + \\
 & \beta_4 Q_{5,i} + \beta_5 T + \beta_6 T Q_{2,i} + \beta_7 T Q_{3,i} + \beta_8 T Q_{4,i} + \beta_9 T Q_{5,i} + \beta_{10} T_{t-t_{OHIP+}} + \\
 & + \beta_{11} T_{t-t_{OHIP+}} Q_{2,i} + \beta_{12} T_{t-t_{OHIP+}} Q_{3,i} + \beta_{13} T_{t-t_{OHIP+}} Q_{4,i} + \beta_{14} T_{t-t_{OHIP+}} Q_{5,i} + \beta_{15} age_i + \\
 & \beta_{16} male_i + \beta_{17} duration_i + \epsilon_{i,t}
 \end{aligned}$$

Where  $y_{i,t}$  is the measured HbA1c for subject  $i$  at time  $t$ , and  $\beta_0$  represents the overall mean HbA1c at time = 0 (January 1, 2016) for subjects in the least deprived quintile. The parameters  $\beta_1$  to  $\beta_4$  are the differences in HbA1c at time = 0 between those in material deprivation quintiles 2-5 and those in quintile 1 (least deprived). The change in HbA1c level per 90 days (slope) during the pre-OHIP+ period for those in deprivation quintile 1 is given by  $\beta_5$ . The

## Supplementary File

difference in pre-OHIP+ slope for deprivation quintiles 2-5 compared to quintile 1 is captured by terms  $\beta_6$  through  $\beta_9$ . The change in slope after OHIP+ (April 1, 2018) (compared to the slope during the pre-OHIP+ time period) for deprivation quintile 1 is given by  $\beta_{10}$ , where  $T_{t-t_{OHIP+}}$  is 0 for observations in the pre-OHIP+ period and time – date of OHIP+ initiation for observations after April 1, 2018.  $\beta_{11}$  to  $\beta_{14}$  give the difference in the change in slope during between the two time periods in deprivation quintiles 2-5 relative to the change in slope in quintile 1. Finally, the effects for a one-year increase in age at time = 0, male vs. female sex and one-year increase in duration of diabetes at time = 0 are captured by  $\beta_{15}$ ,  $\beta_{16}$  and  $\beta_{17}$ , respectively, with  $\epsilon_{i,t}$  = the error term or residual.
